# Supplementary material
Source: MDPI journal article supplement (https://www.mdpi.com/search?q=diversity-12-00423)
Supplement: s001 [file diversity-12-00423-s001.pdf]

Table S1- Summarised list of species, number of specimens and frequency of sighting.

| Order         | Family (as per WoRMS) | Species Name                                                    | Author                      | Nudi Ledge       |              | Mooloolah River  |              |
|---------------|-----------------------|-----------------------------------------------------------------|-----------------------------|------------------|--------------|------------------|--------------|
|               |                       |                                                                 |                             | No. of Specimens | % of surveys | No. of Specimens | % of surveys |
| Acteonoidea#  | Aplustridae           | <i>Bullina lineata</i>                                          | (Gray, 1825)                | -                | -            | 1                | 1            |
| Acteonoidea#  | Aplustridae           | <i>Hydatina physis</i>                                          | (Linnaeus, 1758)            | -                | -            | 24               | 8            |
| Aplysiida     | Aplysiidae            | <i>Aplysia parvula</i> (now determined to be a species complex) | Mörch, 1863                 | 6                | 10           | -                | -            |
| Aplysiida     | Aplysiidae            | <i>Dolabella auricularia</i>                                    | (Lightfoot, 1786)           | -                | -            | 3                | 1            |
| Aplysiida     | Aplysiidae            | <i>Petalifera</i> sp.1                                          | undescribed                 | -                | -            | 4                | 2            |
| Aplysiida     | Aplysiidae            | <i>Phyllaplysia</i> sp. 1                                       | undescribed                 | -                | -            | 7                | 2            |
| Aplysiida     | Aplysiidae            | <i>Phyllaplysia</i> sp. 2                                       | undescribed                 | -                | -            | 6                | 2            |
| Aplysiida     | Aplysiidae            | <i>Phyllaplysia</i> sp. 3                                       | undescribed                 | -                | -            | 1                | 1            |
| Aplysiida     | Aplysiidae            | <i>Stylocheilus striatus</i>                                    | (Quoy & Gaimard, 1832)      | -                | -            | 1                | 1            |
| Cephalaspidea | Aglajidae             | <i>Biuve fulvipunctata</i>                                      | (Baba, 1938)                | 4                | 2            | 26               | 11           |
| Cephalaspidea | Aglajidae             | <i>Chelidonura amoena</i>                                       | Bergh, 1905                 | 1                | 2            | -                | -            |
| Cephalaspidea | Aglajidae             | <i>Chelidonura electra</i>                                      | Rudman, 1970                | 1                | 2            | -                | -            |
| Cephalaspidea | Aglajidae             | <i>Chelidonura</i> sp. 1                                        | undescribed                 | -                | -            | 1                | 1            |
| Cephalaspidea | Aglajidae             | <i>Mariaglaja inornata</i>                                      | (Baba, 1949)                | 48               | 44           | -                | -            |
| Cephalaspidea | Aglajidae             | <i>Melanochlamys queritor</i>                                   | (Burn, 1957)                | -                | -            | 1                | 1            |
| Cephalaspidea | Aglajidae             | <i>Niparaya</i> sp. 1                                           | undescribed                 | -                | -            | 3                | 2            |
| Cephalaspidea | Aglajidae             | <i>Niparaya</i> sp. 2                                           | undescribed                 | -                | -            | 2                | 1            |
| Cephalaspidea | Aglajidae             | <i>Niparaya</i> sp. 3                                           | undescribed                 | -                | -            | 2                | 1            |
| Cephalaspidea | Aglajidae             | <i>Niparaya</i> sp. 4                                           | undescribed                 | -                | -            | 3                | 2            |
| Cephalaspidea | Aglajidae             | <i>Philinopsis speciosa</i>                                     | Pease, 1860                 | 1                | 2            | 23               | 6            |
| Cephalaspidea | Aglajidae             | <i>Philinopsis taronga</i>                                      | (Allan, 1933)               | -                | -            | 1                | 1            |
| Cephalaspidea | Aglajidae             | <i>Spinoaglaja orientalis</i>                                   | (Baba, 1949)                | -                | -            | 10               | 4            |
| Cephalaspidea | Aglajidae             | <i>Spinophallus falciphallus</i>                                | (Gosliner, 2011)            | 1                | 2            | 40               | 14           |
| Cephalaspidea | Aglajidae             | <i>Tubulophilinopsis gardineri</i>                              | (Eliot, 1903)               | -                | -            | 7                | 4            |
| Cephalaspidea | Aglajidae             | <i>Tubulophilinopsis lineolata</i>                              | (H. Adams & A. Adams, 1854) | 1                | 2            | 5                | 3            |
| Cephalaspidea | Aglajidae             | <i>Tubulophilinopsis pilsbryi</i>                               | (Eliot, 1900)               | -                | -            | 16               | 7            |
| Cephalaspidea | Aglajidae             | <i>Tubulophilinopsis reticulata</i>                             | (Eliot, 1903)               | -                | -            | 1                | 1            |
| Cephalaspidea | Bullidae              | <i>Bulla vernicosa</i>                                          | Gould, 1859                 | -                | -            | 3                | 2            |
| Cephalaspidea | Bullidae              | <i>Tornatina (Acteocina)</i> sp. 1                              | undescribed                 | -                | -            | 1                | 1            |
| Cephalaspidea | Colinatydidae         | <i>Colinatys</i> sp. 1                                          | undescribed                 | -                | -            | 2                | 1            |
| Cephalaspidea | Colinatydidae         | <i>Colinatys</i> sp. 2                                          | undescribed                 | -                | -            | 1                | 1            |
| Cephalaspidea | Colpodaspididae       | <i>Colpodaspis</i> sp. 1                                        | undescribed                 | -                | -            | 2                | 1            |
| Cephalaspidea | Colpodaspididae       | <i>Colpodaspis thompsoni</i>                                    | G.H.Brown, 1979             | 3                | 7            | -                | -            |
| Cephalaspidea | Gastropteridae        | <i>Sagaminopteron ornatum</i>                                   | Tokioka & Baba, 1964        | 272              | 93           | -                | -            |

Table S1- Summarised list of species, number of specimens and frequency of sighting.

| Order         | Family (as per WoRMS) | Species Name                                   | Author                          | Nudi Ledge       |              | Mooloolah River  |              |
|---------------|-----------------------|------------------------------------------------|---------------------------------|------------------|--------------|------------------|--------------|
|               |                       |                                                |                                 | No. of Specimens | % of surveys | No. of Specimens | % of surveys |
| Cephalaspidea | Gastropteridae        | <i>Sagaminopteron psychedelicum</i>            | Carlson & Hoff, 1974            | 1                | 2            | -                | -            |
| Cephalaspidea | Gastropteridae        | <i>Siphopteron makisig</i>                     | Ong & Gosliner, 2017            | -                | -            | 2                | 1            |
| Cephalaspidea | Gastropteridae        | <i>Siphopteron</i> sp. 1                       | undescribed                     | -                | -            | 1                | 1            |
| Cephalaspidea | Gastropteridae        | <i>Siphopteron</i> sp. 2                       | undescribed                     | -                | -            | 1                | 1            |
| Cephalaspidea | Gastropteridae        | <i>Siphopteron</i> sp. 4                       | undescribed                     | -                | -            | 2                | 1            |
| Cephalaspidea | Haminoeidae           | <i>Atys semistriata</i>                        | Pease, 1860                     | 8                | 2            | 42               | 9            |
| Cephalaspidea | Haminoeidae           | <i>Atys</i> sp. 5                              | undescribed                     | 1                | 2            | -                | -            |
| Cephalaspidea | Haminoeidae           | <i>Haloa</i> sp. 11                            | undescribed                     | -                | -            | 1                | 1            |
| Cephalaspidea | Haminoeidae           | <i>Haloa</i> sp. 4                             | undescribed                     | 1                | 2            | -                | -            |
| Cephalaspidea | Haminoeidae           | <i>Haloa</i> sp. 9                             | undescribed                     | -                | -            | 3                | 1            |
| Cephalaspidea | Haminoeidae           | <i>Liloa</i> sp. 2                             | undescribed                     | -                | -            | 2                | 1            |
| Cephalaspidea | Mnestiidae            | <i>Mnestia</i> sp. 1                           | undescribed                     | -                | -            | 1                | 1            |
| Cephalaspidea | Retusidae             | <i>Retusa</i> sp. 5                            | undescribed                     | -                | -            | 1                | 1            |
| Nudibranchia  | Abronicidae           | <i>Abronica purpureoanulata</i>                | (Baba, 1961)                    | -                | -            | 1                | 1            |
| Nudibranchia  | Abronicidae           | <i>Abronica</i> sp. 1                          | undescribed                     | 1                | 2            | -                | -            |
| Nudibranchia  | Actinocyclusidae      | <i>Hallaxa iju</i>                             | Gosliner & S. Johnson, 1994     | -                | -            | 3                | 2            |
| Nudibranchia  | Aegiridae             | <i>Aegires citrinus</i>                        | Pruvot-Fol, 1930                | 4                | 7            | -                | -            |
| Nudibranchia  | Aegiridae             | <i>Aegires flores</i>                          | Fahey & Gosliner, 2004          | 12               | 17           | -                | -            |
| Nudibranchia  | Aegiridae             | <i>Aegires villosus</i>                        | Farran, 1905                    | 2                | 5            | 1                | 1            |
| Nudibranchia  | Aegiridae             | <i>Notodoris gardineri</i>                     | Eliot, 1906                     | 7                | 12           | -                | -            |
| Nudibranchia  | Aeolidiidae           | <i>Anteaeolidiella cacaotica</i>               | (Stimpson, 1855)                | -                | -            | 5                | 2            |
| Nudibranchia  | Aeolidiidae           | <i>Anteaeolidiella lurana</i>                  | (Ev. Marcus & Er. Marcus, 1967) | -                | -            | 1                | 1            |
| Nudibranchia  | Aeolidiidae           | <i>Bulbaeolidia alba</i>                       | (Risbec, 1928)                  | 11               | 27           | 117              | 31           |
| Nudibranchia  | Aeolidiidae           | <i>Cerberilla ambonensis</i>                   | Bergh, 1905                     | -                | -            | 5                | 1            |
| Nudibranchia  | Aeolidiidae           | <i>Spurilla braziliana</i>                     | MacFarland, 1909                | -                | -            | 8                | 4            |
| Nudibranchia  | Arminidae             | <i>Dermatobranchus cf. dendronephthyphagus</i> |                                 | -                | -            | 1                | 1            |
| Nudibranchia  | Arminidae             | <i>Dermatobranchus funiculis</i>               | Gosliner & Fahey, 2011          | -                | -            | 6                | 2            |
| Nudibranchia  | Arminidae             | <i>Dermatobranchus oculus</i>                  | Gosliner & Fahey, 2011          | 31               | 34           | 12               | 5            |
| Nudibranchia  | Arminidae             | <i>Dermatobranchus ornatus</i>                 | (Bergh, 1874)                   | 234              | 78           | -                | -            |
| Nudibranchia  | Arminidae             | <i>Dermatobranchus rodmani</i>                 | Gosliner & Fahey, 2011          | 20               | 24           | -                | -            |
| Nudibranchia  | Arminidae             | <i>Dermatobranchus</i> sp. 6                   | undescribed                     | -                | -            | 17               | 4            |
| Nudibranchia  | Arminidae             | <i>Dermatobranchus</i> sp. 7                   | undescribed                     | 134              | 54           | 81               | 15           |
| Nudibranchia  | Arminidae             | <i>Dermatobranchus</i> sp. 8                   | undescribed                     | 2                | 2            | -                | -            |
| Nudibranchia  | Arminidae             | <i>Dermatobranchus tuberculatus</i>            | Gosliner & Fahey, 2011          | 2                | 5            | -                | -            |

Table S1- Summarised list of species, number of specimens and frequency of sighting.

| Order        | Family (as per WoRMS) | Species Name                                    | Author              | Nudi Ledge       |              | Mooloolah River  |              |
|--------------|-----------------------|-------------------------------------------------|---------------------|------------------|--------------|------------------|--------------|
|              |                       |                                                 |                     | No. of Specimens | % of surveys | No. of Specimens | % of surveys |
| Nudibranchia | Bornellidae           | <i>Bornella anguilla</i>                        | S. Johnson, 1984    | 144              | 78           | 2                | 1            |
| Nudibranchia | Chromodorididae       | <i>Ardeadoris angustolutea</i>                  | (Rudman, 1990)      | 3                | 7            | -                | -            |
| Nudibranchia | Chromodorididae       | <i>Ardeadoris averni</i>                        | (Rudman, 1985)      | 20               | 27           | -                | -            |
| Nudibranchia | Chromodorididae       | <i>Ardeadoris rubroannulata</i>                 | (Rudman, 1986)      | 9                | 20           | -                | -            |
| Nudibranchia | Chromodorididae       | <i>Cadlinella ornatissima</i>                   | (Risbec, 1928)      | 12               | 22           | -                | -            |
| Nudibranchia | Chromodorididae       | <i>Ceratosoma tenue</i>                         | Abraham, 1876       | 2                | 5            | 1                | 1            |
| Nudibranchia | Chromodorididae       | <i>Chromodoris elisabethina</i>                 | Bergh, 1877         | 54               | 41           | -                | -            |
| Nudibranchia | Chromodorididae       | <i>Chromodoris kuiteri</i>                      | Rudman, 1982        | 178              | 78           | -                | -            |
| Nudibranchia | Chromodorididae       | <i>Chromodoris lochi</i>                        | Rudman, 1982        | 5                | 7            | -                | -            |
| Nudibranchia | Chromodorididae       | <i>Chromodoris</i> sp.3                         | undescribed         | 7                | 5            | -                | -            |
| Nudibranchia | Chromodorididae       | <i>Chromodoris</i> sp.5 was <i>C.striatella</i> | undescribed         | 14               | 20           | 1                | 1            |
| Nudibranchia | Chromodorididae       | <i>Chromodoris strigata</i>                     | Rudman, 1982        | 1                | 2            | -                | -            |
| Nudibranchia | Chromodorididae       | <i>Diversidoris aurantionodulosa</i>            | Rudman, 1987        | 1                | 2            | 1                | 1            |
| Nudibranchia | Chromodorididae       | <i>Diversidoris crocea</i>                      | (Rudman, 1986)      | 5                | 10           | -                | -            |
| Nudibranchia | Chromodorididae       | <i>Diversidoris flava</i>                       | (Eliot, 1904)       | 5                | 12           | -                | -            |
| Nudibranchia | Chromodorididae       | <i>Diversidoris</i> sp.1                        | undescribed         | -                | -            | 1                | 1            |
| Nudibranchia | Chromodorididae       | <i>Doriprismatica atromarginata</i>             | (Cuvier, 1804)      | 938              | 100          | -                | -            |
| Nudibranchia | Chromodorididae       | <i>Glossodoris hikuereensis</i>                 | (Pruvot-Fol, 1954)  | 1                | 2            | -                | -            |
| Nudibranchia | Chromodorididae       | <i>Glossodoris rufomarginata</i>                | (Bergh, 1890)       | 106              | 59           | -                | -            |
| Nudibranchia | Chromodorididae       | <i>Glossodoris</i> sp.3                         | undescribed         | 3                | 5            | -                | -            |
| Nudibranchia | Chromodorididae       | <i>Glossodoris</i> sp.5                         | undescribed         | 2                | 5            | -                | -            |
| Nudibranchia | Chromodorididae       | <i>Glossodoris vespa</i>                        | Rudman, 1990        | 64               | 59           | -                | -            |
| Nudibranchia | Chromodorididae       | <i>Goniobranchus albonares</i>                  | (Rudman, 1990)      | 4                | 7            | 3                | 2            |
| Nudibranchia | Chromodorididae       | <i>Goniobranchus albopunctatus</i>              | Garrett, 1879       | 4                | 10           | -                | -            |
| Nudibranchia | Chromodorididae       | <i>Goniobranchus aureopurpureus</i>             | (Collingwood, 1881) | -                | -            | 66               | 25           |
| Nudibranchia | Chromodorididae       | <i>Goniobranchus coi</i>                        | (Risbec, 1956)      | 2                | 5            | -                | -            |
| Nudibranchia | Chromodorididae       | <i>Goniobranchus collingwoodi</i>               | (Rudman, 1987)      | 11               | 20           | 34               | 14           |
| Nudibranchia | Chromodorididae       | <i>Goniobranchus daphne</i>                     | (Angas, 1864)       | 37               | 29           | 1124             | 83           |
| Nudibranchia | Chromodorididae       | <i>Goniobranchus decorus</i>                    | (Pease, 1860)       | 9                | 15           | 123              | 33           |
| Nudibranchia | Chromodorididae       | <i>Goniobranchus geometricus</i>                | (Risbec, 1928)      | 18               | 27           | 25               | 13           |
| Nudibranchia | Chromodorididae       | <i>Goniobranchus kuniei</i>                     | (Pruvot-Fol, 1930)  | 8                | 12           | -                | -            |
| Nudibranchia | Chromodorididae       | <i>Goniobranchus rufomaculatus</i>              | (Pease, 1871)       | -                | -            | 1                | 1            |
| Nudibranchia | Chromodorididae       | <i>Goniobranchus</i> sp.4                       | undescribed         | 5                | 12           | -                | -            |
| Nudibranchia | Chromodorididae       | <i>Goniobranchus</i> sp.5                       | undescribed         | 1                | 2            | 1                | 1            |

Table S1- Summarised list of species, number of specimens and frequency of sighting.

| Order        | Family (as per WoRMS) | Species Name                           | Author                          | Nudi Ledge       |              | Mooloolah River  |              |
|--------------|-----------------------|----------------------------------------|---------------------------------|------------------|--------------|------------------|--------------|
|              |                       |                                        |                                 | No. of Specimens | % of surveys | No. of Specimens | % of surveys |
| Nudibranchia | Chromodorididae       | <i>Goniobranchus</i> sp.6              | undescribed                     | 21               | 41           | 52               | 16           |
| Nudibranchia | Chromodorididae       | <i>Goniobranchus splendidus</i>        | (Angas, 1864)                   | 121              | 68           | 39               | 15           |
| Nudibranchia | Chromodorididae       | <i>Goniobranchus tinctorius</i>        | (Rüppell & Leuckart, 1830)      | 2                | 5            | -                | -            |
| Nudibranchia | Chromodorididae       | <i>Goniobranchus verrieri</i>          | (Crosse, 1875)                  | 7                | 15           | 25               | 8            |
| Nudibranchia | Chromodorididae       | <i>Hypselodoris apolegma</i>           | (Yonow, 2001)                   | 1                | 2            | -                | -            |
| Nudibranchia | Chromodorididae       | <i>Hypselodoris bullockii</i>          | (Collingwood, 1881)             | 20               | 32           | -                | -            |
| Nudibranchia | Chromodorididae       | <i>Hypselodoris imperialis</i>         | (Pease, 1860)                   | 1                | 2            | -                | -            |
| Nudibranchia | Chromodorididae       | <i>Hypselodoris lacuna</i>             | Gosliner & R. F. Johnson, 2018  | 3                | 7            | -                | -            |
| Nudibranchia | Chromodorididae       | <i>Hypselodoris maritima</i>           | (Baba, 1949)                    | 22               | 34           | -                | -            |
| Nudibranchia | Chromodorididae       | <i>Hypselodoris melanesica</i>         | Gosliner & R. F. Johnson, 2018  | 2                | 5            | -                | -            |
| Nudibranchia | Chromodorididae       | <i>Hypselodoris obscura</i>            | (Stimpson, 1855)                | 60               | 46           | 891              | 90           |
| Nudibranchia | Chromodorididae       | <i>Hypselodoris roo</i>                | Gosliner & R. F. Johnson, 2018  | -                | -            | 6                | 4            |
| Nudibranchia | Chromodorididae       | <i>Hypselodoris sagamiensis</i>        | (Baba, 1949)                    | 20               | 37           | -                | -            |
| Nudibranchia | Chromodorididae       | <i>Hypselodoris</i> sp.8               | undescribed                     | -                | -            | 1                | 1            |
| Nudibranchia | Chromodorididae       | <i>Hypselodoris tryoni</i>             | (Garrett, 1873)                 | 1                | 2            | -                | -            |
| Nudibranchia | Chromodorididae       | <i>Hypselodoris whitei</i>             | (A. Adams & Reeve, 1850)        | 3                | 5            | 8                | 3            |
| Nudibranchia | Chromodorididae       | <i>Hypselodoris zephyra</i>            | Gosliner & R. F. Johnson, 1999  | -                | -            | 10               | 5            |
| Nudibranchia | Chromodorididae       | <i>Mexichromis aurora</i>              | (R.F. Johnson & Gosliner, 1998) | 1                | 2            | -                | -            |
| Nudibranchia | Chromodorididae       | <i>Mexichromis cf multituberculata</i> |                                 | -                | -            | 3                | 1            |
| Nudibranchia | Chromodorididae       | <i>Mexichromis festiva</i>             | (Angas, 1864)                   | 4                | 10           | -                | -            |
| Nudibranchia | Chromodorididae       | <i>Mexichromis mariei</i>              | (Crosse, 1872)                  | 1                | 2            | -                | -            |
| Nudibranchia | Chromodorididae       | <i>Mexichromis pusilla</i>             | (Bergh, 1874)                   | 2                | 5            | -                | -            |
| Nudibranchia | Chromodorididae       | <i>Miamira magnifica</i>               | Eliot, 1910                     | 1                | 2            | -                | -            |
| Nudibranchia | Chromodorididae       | <i>Miamira moloch</i>                  | (Rudman, 1988)                  | 1                | 2            | -                | -            |
| Nudibranchia | Chromodorididae       | <i>Miamira sinuata</i>                 | (van Hasselt, 1824)             | 1                | 2            | -                | -            |
| Nudibranchia | Chromodorididae       | <i>Thorunna daniellae</i>              | (Kay & Young, 1969)             | 2                | 5            | -                | -            |
| Nudibranchia | Chromodorididae       | <i>Thorunna florens</i>                | (Baba, 1949)                    | 1                | 2            | -                | -            |
| Nudibranchia | Chromodorididae       | <i>Verconia alboannulata</i>           | (Rudman, 1986)                  | 2                | 5            | -                | -            |
| Nudibranchia | Chromodorididae       | <i>Verconia decussata</i>              | (Risbec, 1928)                  | 2                | 5            | -                | -            |
| Nudibranchia | Chromodorididae       | <i>Verconia haliclona</i>              | (Burn, 1957)                    | 3                | 7            | -                | -            |
| Nudibranchia | Chromodorididae       | <i>Verconia laboutei</i>               | (Rudman, 1986)                  | 3                | 7            | -                | -            |
| Nudibranchia | Chromodorididae       | <i>Verconia norba</i>                  | (Er. Marcus & Ev. Marcus, 1970) | 9                | 20           | -                | -            |
| Nudibranchia | Chromodorididae       | <i>Verconia romeri</i>                 | (Risbec, 1928)                  | 4                | 10           | 2                | 1            |
| Nudibranchia | Chromodorididae       | <i>Verconia simplex</i>                | (Pease, 1871)                   | 12               | 27           | 31               | 14           |

Table S1- Summarised list of species, number of specimens and frequency of sighting.

| Order        | Family (as per WoRMS) | Species Name                                | Author                     | Nudi Ledge       |              | Mooloolah River  |              |
|--------------|-----------------------|---------------------------------------------|----------------------------|------------------|--------------|------------------|--------------|
|              |                       |                                             |                            | No. of Specimens | % of surveys | No. of Specimens | % of surveys |
| Nudibranchia | Chromodorididae       | <i>Verconia</i> sp. 2                       | undescribed                | 3                | 7            | -                | -            |
| Nudibranchia | Cuthonidae            | <i>Cuthona puellula</i>                     | (Baba, 1955)               | 1                | 2            | 14               | 7            |
| Nudibranchia | Dendrodorididae       | <i>Dendrodoris arborescens</i>              | (Collingwood, 1881)        | -                | -            | 12               | 4            |
| Nudibranchia | Dendrodorididae       | <i>Dendrodoris atromaculata</i>             | (Alder & Hancock, 1864)    | -                | -            | 3                | 2            |
| Nudibranchia | Dendrodorididae       | <i>Dendrodoris fumata</i>                   | (Rüppell & Leuckart, 1830) | -                | -            | 10               | 5            |
| Nudibranchia | Dendrodorididae       | <i>Dendrodoris krusensternii (denisoni)</i> | (Gray, 1850)               | -                | -            | 9                | 5            |
| Nudibranchia | Dendrodorididae       | <i>Dendrodoris nigra</i>                    | (Stimpson, 1855)           | -                | -            | 11               | 6            |
| Nudibranchia | Discodorididae        | <i>Atagema</i> sp. 3                        | undescribed                | -                | -            | 1                | 1            |
| Nudibranchia | Discodorididae        | <i>Atagema spongiosa</i>                    | (Kelaart, 1858)            | -                | -            | 1                | 1            |
| Nudibranchia | Discodorididae        | <i>Carminodoris nodulosa</i>                | (Angas, 1864)              | 3                | 7            | 17               | 7            |
| Nudibranchia | Discodorididae        | <i>Carminodoris</i> sp. 3                   | undescribed                | -                | -            | 2                | 1            |
| Nudibranchia | Discodorididae        | <i>Discodoris cebuensis</i>                 | Bergh, 1877                | 1                | 2            | 2                | 1            |
| Nudibranchia | Discodorididae        | <i>Discodoris coerulescens</i>              | Bergh, 1888                | -                | -            | 1                | 1            |
| Nudibranchia | Discodorididae        | <i>Discodoris lilacina</i>                  | (Gould, 1852)              | -                | -            | 10               | 4            |
| Nudibranchia | Discodorididae        | <i>Discodoris</i> sp. 1                     | undescribed                | -                | -            | 2                | 1            |
| Nudibranchia | Discodorididae        | <i>Discodoris</i> sp. 5                     | undescribed                | -                | -            | 1                | 1            |
| Nudibranchia | Discodorididae        | <i>Discodoris</i> sp. 6                     | undescribed                | -                | -            | 1                | 1            |
| Nudibranchia | Discodorididae        | <i>Discodoris</i> sp. 7                     | undescribed                | -                | -            | 1                | 1            |
| Nudibranchia | Discodorididae        | <i>Halgerda aurantiomaculata</i>            | (Allan, 1932)              | 2                | 5            | -                | -            |
| Nudibranchia | Discodorididae        | <i>Jorunna parva</i>                        | (Baba, 1938)               | 8                | 12           | 8                | 4            |
| Nudibranchia | Discodorididae        | <i>Jorunna ramicola</i>                     | M.C. Miller, 1996          | -                | -            | 4                | 1            |
| Nudibranchia | Discodorididae        | <i>Jorunna</i> sp. 2                        | undescribed                | -                | -            | 2                | 1            |
| Nudibranchia | Discodorididae        | <i>Jorunna</i> sp. 3                        | undescribed                | 17               | 27           | 9                | 4            |
| Nudibranchia | Discodorididae        | <i>Jorunna</i> sp. 6                        | undescribed                | -                | -            | 7                | 1            |
| Nudibranchia | Discodorididae        | <i>Jorunna</i> sp. 8                        | undescribed                | 2                | 2            | -                | -            |
| Nudibranchia | Discodorididae        | <i>Platydoris elliotti</i>                  | (Alder & Hancock, 1864)    | -                | -            | 2                | 1            |
| Nudibranchia | Discodorididae        | <i>Platydoris</i> sp. 1                     | undescribed                | -                | -            | 1                | 1            |
| Nudibranchia | Discodorididae        | <i>Rostanga arbutus</i>                     | (Angas, 1864)              | -                | -            | 3                | 2            |
| Nudibranchia | Discodorididae        | <i>Rostanga bifurcata</i>                   | Rudman & Avern, 1989       | -                | -            | 1                | 1            |
| Nudibranchia | Discodorididae        | <i>Rostanga craufordi</i>                   | (Burn, 1969)               | -                | -            | 2                | 1            |
| Nudibranchia | Discodorididae        | <i>Rostanga</i> sp. 1                       | undescribed                | -                | -            | 9                | 5            |
| Nudibranchia | Discodorididae        | <i>Sclerodoris apiculata</i>                | (Alder & Hancock, 1864)    | -                | -            | 1                | 1            |
| Nudibranchia | Discodorididae        | <i>Sclerodoris</i> sp. 10                   | undescribed                | -                | -            | 1                | 1            |
| Nudibranchia | Discodorididae        | <i>Sclerodoris</i> sp. 9                    | undescribed                | -                | -            | 1                | 1            |

Table S1- Summarised list of species, number of specimens and frequency of sighting.

| Order        | Family (as per WoRMS) | Species Name               | Author                  | Nudi Ledge       |              | Mooloolah River  |              |
|--------------|-----------------------|----------------------------|-------------------------|------------------|--------------|------------------|--------------|
|              |                       |                            |                         | No. of Specimens | % of surveys | No. of Specimens | % of surveys |
| Nudibranchia | Discodorididae        | <i>Sebadoris fragilis</i>  | (Alder & Hancock, 1864) | -                | -            | 12               | 4            |
| Nudibranchia | Discodorididae        | <i>Thordisa albomacula</i> | Chan & Gosliner, 2007   | -                | -            | 2                | 1            |
| Nudibranchia | Discodorididae        | <i>Thordisa tahala</i>     | Chan & Gosliner, 2007   | -                | -            | 4                | 1            |
| Nudibranchia | Discodorididae        | <i>Thordisa villosa</i>    | (Alder & Hancock, 1864) | -                | -            | 1                | 1            |
| Nudibranchia | Dorididae             | <i>Doris immonda</i>       | Risbec, 1928            | -                | -            | 1                | 1            |
| Nudibranchia | Dotidae               | <i>Doto</i> sp.3           | undescribed             | -                | -            | 60               | 11           |
| Nudibranchia | Dotidae               | <i>Doto</i> sp.4           | undescribed             | -                | -            | 13               | 2            |
| Nudibranchia | Dotidae               | <i>Doto</i> sp.5           | undescribed             | 1                | 2            | 1                | 1            |
| Nudibranchia | Dotidae               | <i>Doto</i> sp.6           | undescribed             | -                | -            | 21               | 2            |
| Nudibranchia | Eubranichidae         | <i>Eubranichus inabai</i>  | Baba, 1964              | -                | -            | 1                | 1            |
| Nudibranchia | Eubranichidae         | <i>Eubranichus</i> sp.10   | undescribed             | -                | -            | 93               | 17           |
| Nudibranchia | Eubranichidae         | <i>Eubranichus</i> sp.11   | undescribed             | 1                | 2            | -                | -            |
| Nudibranchia | Eubranichidae         | <i>Eubranichus</i> sp.13   | undescribed             | -                | -            | 18               | 4            |
| Nudibranchia | Eubranichidae         | <i>Eubranichus</i> sp.14   | undescribed             | -                | -            | 1                | 1            |
| Nudibranchia | Eubranichidae         | <i>Eubranichus</i> sp.3    | undescribed             | 2                | 5            | 7                | 3            |
| Nudibranchia | Eubranichidae         | <i>Eubranichus</i> sp.6    | undescribed             | 1                | 2            | -                | -            |
| Nudibranchia | Eubranichidae         | <i>Eubranichus</i> sp.7    | undescribed             | 1                | 2            | -                | -            |
| Nudibranchia | Facelinidae           | <i>Austraeolis ornata</i>  | (Angas, 1864)           | -                | -            | 1                | 1            |
| Nudibranchia | Facelinidae           | <i>Cratena lineata</i>     | (Eliot, 1905)           | 24               | 32           | 368              | 38           |
| Nudibranchia | Facelinidae           | <i>Cratena simba</i>       | Edmunds, 1970           | 14               | 22           | 38               | 17           |
| Nudibranchia | Facelinidae           | <i>Cratena</i> sp.3        | undescribed             | -                | -            | 4                | 2            |
| Nudibranchia | Facelinidae           | <i>Cratena</i> sp.4        | undescribed             | -                | -            | 1                | 1            |
| Nudibranchia | Facelinidae           | <i>Cratena</i> sp.5        | undescribed             | -                | -            | 3                | 1            |
| Nudibranchia | Facelinidae           | <i>Cratena</i> sp.6        | undescribed             | -                | -            | 1                | 1            |
| Nudibranchia | Facelinidae           | <i>Facelina</i> sp.10      | undescribed             | -                | -            | 1                | 1            |
| Nudibranchia | Facelinidae           | <i>Facelina</i> sp.11      | undescribed             | -                | -            | 23               | 5            |
| Nudibranchia | Facelinidae           | <i>Facelina</i> sp.12      | undescribed             | -                | -            | 2                | 1            |
| Nudibranchia | Facelinidae           | <i>Facelina</i> sp.3       | undescribed             | 1                | 2            | 19               | 8            |
| Nudibranchia | Facelinidae           | <i>Facelina</i> sp.4       | undescribed             | -                | -            | 1                | 1            |
| Nudibranchia | Facelinidae           | <i>Facelina</i> sp.6       | undescribed             | 2                | 5            | -                | -            |
| Nudibranchia | Facelinidae           | <i>Facelina</i> sp.7       | undescribed             | -                | -            | 3                | 2            |
| Nudibranchia | Facelinidae           | <i>Facelina</i> sp.8       | undescribed             | -                | -            | 25               | 7            |
| Nudibranchia | Facelinidae           | <i>Facelina</i> sp.9       | undescribed             | -                | -            | 1                | 1            |
| Nudibranchia | Facelinidae           | <i>Favorinus</i> sp.1      | undescribed             | 1                | 2            | 23               | 6            |

Table S1- Summarised list of species, number of specimens and frequency of sighting.

| Order        | Family (as per WoRMS) | Species Name                     | Author                    | Nudi Ledge       |              | Mooloolah River  |              |
|--------------|-----------------------|----------------------------------|---------------------------|------------------|--------------|------------------|--------------|
|              |                       |                                  |                           | No. of Specimens | % of surveys | No. of Specimens | % of surveys |
| Nudibranchia | Facelinidae           | <i>Favorinus</i> sp.3            | undescribed               | -                | -            | 1                | 1            |
| Nudibranchia | Facelinidae           | <i>Favorinus tsuruganus</i>      | Baba & Abe, 1964          | -                | -            | 3                | 1            |
| Nudibranchia | Facelinidae           | <i>Myja longicornis</i>          | Bergh, 1896               | -                | -            | 13               | 5            |
| Nudibranchia | Facelinidae           | <i>Noumeaella</i> sp.1           | undescribed               | -                | -            | 4                | 2            |
| Nudibranchia | Facelinidae           | <i>Noumeaella</i> sp.2           | undescribed               | -                | -            | 2                | 1            |
| Nudibranchia | Facelinidae           | <i>Phidiana bourailli</i>        | (Risbec, 1928)            | -                | -            | 59               | 19           |
| Nudibranchia | Facelinidae           | <i>Pruvotfolia</i> sp.1          | undescribed               | -                | -            | 4                | 2            |
| Nudibranchia | Facelinidae           | <i>Pteraeolidia semperi</i>      | (Bergh, 1870)             | 146              | 85           | 1559             | 82           |
| Nudibranchia | Facelinidae           | <i>Sakuraeolis nungunoides</i>   | Rudman, 1980              | -                | -            | 90               | 11           |
| Nudibranchia | Flabellinidae         | <i>Coryphellina exoptata</i>     | (Gosliner & Willan, 1991) | 5                | 10           | 3                | 2            |
| Nudibranchia | Flabellinidae         | <i>Coryphellina rubrolineata</i> | O'Donoghue, 1929          | 34               | 41           | 904              | 61           |
| Nudibranchia | Flabellinidae         | <i>Flabellina</i> sp.2           | undescribed               | 1                | 2            | -                | -            |
| Nudibranchia | Flabellinidae         | <i>Flabellina</i> sp.3           | undescribed               | -                | -            | 3                | 2            |
| Nudibranchia | Flabellinidae         | <i>Flabellina</i> sp.4           | undescribed               | -                | -            | 18               | 5            |
| Nudibranchia | Goniodorididae        | <i>Goniodoridella savignyi</i>   | Pruvot-Fol, 1933          | 21               | 37           | 313              | 35           |
| Nudibranchia | Goniodorididae        | <i>Goniodoridella</i> sp.1       | undescribed               | -                | -            | 1743             | 82           |
| Nudibranchia | Goniodorididae        | <i>Goniodoridella</i> sp.3       | undescribed               | -                | -            | 11               | 5            |
| Nudibranchia | Goniodorididae        | <i>Goniodoridella</i> sp.4       | undescribed               | -                | -            | 3                | 2            |
| Nudibranchia | Goniodorididae        | <i>Goniodoridella</i> sp.5       | undescribed               | -                | -            | 18               | 7            |
| Nudibranchia | Goniodorididae        | <i>Goniodoridella</i> sp.6       | undescribed               | -                | -            | 5                | 3            |
| Nudibranchia | Goniodorididae        | <i>Goniodoridella</i> sp.7       | undescribed               | -                | -            | 10               | 2            |
| Nudibranchia | Goniodorididae        | <i>Goniodoris joubini</i>        | Risbec, 1928              | 2                | 5            | -                | -            |
| Nudibranchia | Goniodorididae        | <i>Goniodoris</i> sp.2           | undescribed               | -                | -            | 1                | 1            |
| Nudibranchia | Goniodorididae        | <i>Goniodoris</i> sp.4           | undescribed               | -                | -            | 2                | 1            |
| Nudibranchia | Goniodorididae        | <i>Okenia hallucigenia</i>       | Rudman, 2004              | 12               | 2            | -                | -            |
| Nudibranchia | Goniodorididae        | <i>Okenia liklik</i>             | Gosliner, 2004            | 1                | 2            | 14               | 7            |
| Nudibranchia | Goniodorididae        | <i>Okenia</i> sp.1               | undescribed               | -                | -            | 1                | 1            |
| Nudibranchia | Goniodorididae        | <i>Okenia</i> sp.2               | undescribed               | -                | -            | 1                | 1            |
| Nudibranchia | Goniodorididae        | <i>Okenia</i> sp.3               | undescribed               | -                | -            | 1                | 1            |
| Nudibranchia | Goniodorididae        | <i>Trapania brunnea</i>          | Rudman, 1987              | -                | -            | 3                | 2            |
| Nudibranchia | Goniodorididae        | <i>Trapania euryeia</i>          | Gosliner & Fahey, 2008    | -                | -            | 1                | 1            |
| Nudibranchia | Goniodorididae        | <i>Trapania gibbera</i>          | Gosliner & Fahey, 2008    | -                | -            | 1                | 1            |
| Nudibranchia | Goniodorididae        | <i>Trapania japonica</i>         | (Baba, 1935)              | -                | -            | 1                | 1            |
| Nudibranchia | Goniodorididae        | <i>Trapania miltabanchia</i>     | Gosliner & Fahey, 2008    | -                | -            | 1                | 1            |

Table S1- Summarised list of species, number of specimens and frequency of sighting.

| Order        | Family (as per WoRMS) | Species Name                       | Author                            | Nudi Ledge       |              | Mooloolah River  |              |
|--------------|-----------------------|------------------------------------|-----------------------------------|------------------|--------------|------------------|--------------|
|              |                       |                                    |                                   | No. of Specimens | % of surveys | No. of Specimens | % of surveys |
| Nudibranchia | Goniodorididae        | <i>Trapania scurra</i>             | Gosliner & Fahey, 2008            | 1                | 2            | 3                | 1            |
| Nudibranchia | Goniodorididae        | <i>Trapania vitta</i>              | Gosliner & Fahey, 2008            | 6                | 12           | 1                | 1            |
| Nudibranchia | Hexabanchidae         | <i>Hexabanchus sanguineus</i>      | (Rüppell & Leuckart, 1830)        | 25               | 27           | -                | -            |
| Nudibranchia | Janolidae             | <i>Janolus</i> sp.2                | undescribed                       | 1                | 2            | -                | -            |
| Nudibranchia | Lomanotidae           | <i>Lomanotus</i> sp.1              | undescribed                       | -                | -            | 3                | 2            |
| Nudibranchia | Lomanotidae           | <i>Lomanotus</i> sp.2              | undescribed                       | -                | -            | 13               | 5            |
| Nudibranchia | Lomanotidae           | <i>Lomanotus</i> sp.3              | undescribed                       | -                | -            | 25               | 3            |
| Nudibranchia | Lomanotidae           | <i>Lomanotus</i> sp.4              | undescribed                       | -                | -            | 19               | 5            |
| Nudibranchia | Lomanotidae           | <i>Lomanotus</i> sp.5              | undescribed                       | -                | -            | 9                | 2            |
| Nudibranchia | Lomanotidae           | <i>Lomanotus</i> sp.6              | undescribed                       | -                | -            | 1                | 1            |
| Nudibranchia | Lomanotidae           | <i>Lomanotus vermiformis</i>       | Eliot, 1908                       | 2                | 2            | 2                | 1            |
| Nudibranchia | Madrellidae           | <i>Madrella ferruginosa</i>        | Alder & Hancock, 1864             | -                | -            | 7                | 3            |
| Nudibranchia | Myrrhinidae           | <i>Godiva</i> sp.2                 | undescribed                       | -                | -            | 30               | 6            |
| Nudibranchia | Myrrhinidae           | <i>Phyllodesmium acanthorhinum</i> | Moore & Gosliner, 2014            | -                | -            | 8                | 4            |
| Nudibranchia | Myrrhinidae           | <i>Phyllodesmium colemani</i>      | Rudman, 1991                      | 1                | 2            | -                | -            |
| Nudibranchia | Myrrhinidae           | <i>Phyllodesmium crypticum</i>     | Rudman, 1981                      | 4                | 10           | -                | -            |
| Nudibranchia | Myrrhinidae           | <i>Phyllodesmium karenae</i>       | Moore & Gosliner, 2009            | -                | -            | 2                | 1            |
| Nudibranchia | Myrrhinidae           | <i>Phyllodesmium koehleri</i>      | Burghardt, Schrödl & Wägele, 2008 | 2                | 5            | -                | -            |
| Nudibranchia | Myrrhinidae           | <i>Phyllodesmium macphersonae</i>  | (Burn, 1962)                      | 16               | 20           | -                | -            |
| Nudibranchia | Myrrhinidae           | <i>Phyllodesmium magnum</i>        | Rudman, 1991                      | 20               | 20           | -                | -            |
| Nudibranchia | Myrrhinidae           | <i>Phyllodesmium opalescens</i>    | Rudman, 1991                      | -                | -            | 53               | 18           |
| Nudibranchia | Myrrhinidae           | <i>Phyllodesmium poindimiei</i>    | (Risbec, 1928)                    | 1                | 2            | 7                | 3            |
| Nudibranchia | Myrrhinidae           | <i>Phyllodesmium</i> sp.2          | undescribed                       | 7                | 15           | -                | -            |
| Nudibranchia | Myrrhinidae           | <i>Phyllodesmium undulatum</i>     | Moore & Gosliner, 2014            | -                | -            | 5                | 2            |
| Nudibranchia | Phyllidiidae          | <i>Phyllidia coelestis</i>         | Bergh, 1905                       | 1                | 2            | -                | -            |
| Nudibranchia | Phyllidiidae          | <i>Phyllidia elegans</i>           | Bergh, 1869                       | 11               | 17           | -                | -            |
| Nudibranchia | Phyllidiidae          | <i>Phyllidia exquisita</i>         | Brunckhorst, 1993                 | 13               | 20           | -                | -            |
| Nudibranchia | Phyllidiidae          | <i>Phyllidia guamensis</i>         | (Brunckhorst, 1993)               | 1                | 2            | -                | -            |
| Nudibranchia | Phyllidiidae          | <i>Phyllidia madangensis</i>       | Brunckhorst, 1993                 | 1                | 2            | -                | -            |
| Nudibranchia | Phyllidiidae          | <i>Phyllidia ocellata</i>          | Cuvier, 1804                      | 175              | 98           | -                | -            |
| Nudibranchia | Phyllidiidae          | <i>Phyllidia picta</i>             | Pruvot-Fol, 1957                  | 28               | 49           | -                | -            |
| Nudibranchia | Phyllidiidae          | <i>Phyllidia varicosa</i>          | Lamarck, 1801                     | 31               | 46           | -                | -            |
| Nudibranchia | Phyllidiidae          | <i>Phyllidiella coaraburrana</i>   | Brunckhorst, 1993                 | 4                | 5            | -                | -            |
| Nudibranchia | Phyllidiidae          | <i>Phyllidiella lizae</i>          | Brunckhorst, 1993                 | 131              | 95           | -                | -            |



Table S1- Summarised list of species, number of specimens and frequency of sighting.

| Order        | Family (as per WoRMS) | Species Name                     | Author                         | Nudi Ledge       |              | Mooloolah River  |              |
|--------------|-----------------------|----------------------------------|--------------------------------|------------------|--------------|------------------|--------------|
|              |                       |                                  |                                | No. of Specimens | % of surveys | No. of Specimens | % of surveys |
| Nudibranchia | Phyllidiidae          | <i>Phyllidiella pustulosa</i>    | (Cuvier, 1804)                 | 226              | 98           | -                | -            |
| Nudibranchia | Phyllidiidae          | <i>Phyllidiella</i> sp. 3        | undescribed                    | 1                | 2            | -                | -            |
| Nudibranchia | Phyllidiidae          | <i>Phyllidiopsis cardinalis</i>  | Bergh, 1876                    | 3                | 7            | -                | -            |
| Nudibranchia | Phyllidiidae          | <i>Phyllidiopsis krempfi</i>     | Pruvot-Fol, 1957               | 1                | 2            | -                | -            |
| Nudibranchia | Phyllidiidae          | <i>Phyllidiopsis loricata</i>    | (Bergh, 1873)                  | 1                | 2            | -                | -            |
| Nudibranchia | Phyllidiidae          | <i>Phyllidiopsis shireenae</i>   | Brunckhorst, 1990              | 2                | 5            | -                | -            |
| Nudibranchia | Phyllidiidae          | <i>Phyllidiopsis burni</i>       | Brunckhorst, 1993              | 22               | 29           | -                | -            |
| Nudibranchia | Pleurolidiidae        | <i>Pleurolidia juliae</i>        | Burn, 1966                     | 63               | 49           | -                | -            |
| Nudibranchia | Polyceridae           | <i>Gymnodoris alba</i>           | (Bergh, 1877)                  | 17               | 27           | 26               | 8            |
| Nudibranchia | Polyceridae           | <i>Gymnodoris amakusana</i>      | (Baba, 1996)                   | -                | -            | 62               | 15           |
| Nudibranchia | Polyceridae           | <i>Gymnodoris nigricolor</i>     | Baba, 1960                     | -                | -            | 10               | 6            |
| Nudibranchia | Polyceridae           | <i>Gymnodoris</i> sp. 10         | undescribed                    | 2                | 5            | 108              | 33           |
| Nudibranchia | Polyceridae           | <i>Gymnodoris</i> sp. 13         | undescribed                    | -                | -            | 21               | 6            |
| Nudibranchia | Polyceridae           | <i>Gymnodoris</i> sp. 14         | undescribed                    | -                | -            | 2                | 1            |
| Nudibranchia | Polyceridae           | <i>Gymnodoris</i> sp. 17         | undescribed                    | -                | -            | 34               | 13           |
| Nudibranchia | Polyceridae           | <i>Gymnodoris</i> sp. 20         | undescribed                    | -                | -            | 4                | 2            |
| Nudibranchia | Polyceridae           | <i>Gymnodoris</i> sp. 21         | undescribed                    | -                | -            | 1                | 1            |
| Nudibranchia | Polyceridae           | <i>Gymnodoris</i> sp. 23         | undescribed                    | -                | -            | 4                | 2            |
| Nudibranchia | Polyceridae           | <i>Gymnodoris</i> sp. 8          | undescribed                    | -                | -            | 2                | 1            |
| Nudibranchia | Polyceridae           | <i>Gymnodoris</i> sp. 9          | undescribed                    | 1                | 2            | 66               | 19           |
| Nudibranchia | Polyceridae           | <i>Kaloplocamus acutus</i>       | Baba, 1949                     | 1                | 2            | -                | -            |
| Nudibranchia | Polyceridae           | <i>Kaloplocamus</i> sp. 1        | undescribed                    | -                | -            | 2                | 1            |
| Nudibranchia | Polyceridae           | <i>Nembrotha lineolata</i>       | Bergh, 1905                    | 2                | 5            | -                | -            |
| Nudibranchia | Polyceridae           | <i>Nembrotha purpureolineata</i> | O'Donoghue, 1924               | 7                | 12           | -                | -            |
| Nudibranchia | Polyceridae           | <i>Plocamopherus ceylonicus</i>  | (Kelaart, 1858)                | -                | -            | 4                | 2            |
| Nudibranchia | Polyceridae           | <i>Plocamopherus pecoso</i>      | Vallès & Gosliner, 2006        | -                | -            | 1                | 1            |
| Nudibranchia | Polyceridae           | <i>Plocamopherus tilesii</i>     | Bergh, 1877                    | -                | -            | 3                | 2            |
| Nudibranchia | Polyceridae           | <i>Polycera risbeci</i>          | Odhner, 1941                   | -                | -            | 1                | 1            |
| Nudibranchia | Polyceridae           | <i>Polycera</i> sp. 1            | undescribed                    | -                | -            | 1                | 1            |
| Nudibranchia | Polyceridae           | <i>Polycera</i> sp. 6            | undescribed                    | -                | -            | 1                | 1            |
| Nudibranchia | Polyceridae           | <i>Tambja tenuilineata</i>       | M.C. Miller & Haagh, 2005      | 33               | 20           | -                | -            |
| Nudibranchia | Polyceridae           | <i>Tambja victoriae</i>          | Pola, Cervera & Gosliner, 2005 | 1                | 2            | -                | -            |
| Nudibranchia | Polyceridae           | <i>Tyrannodoris luteolineata</i> | (Baba, 1936)                   | 85               | 68           | -                | -            |
| Nudibranchia | Samlidae              | <i>Samla bicolor</i>             | (Kelaart, 1858)                | 1                | 2            | -                | -            |

Table S1- Summarised list of species, number of specimens and frequency of sighting.

| Order        | Family (as per WoRMS) | Species Name                   | Author                     | Nudi Ledge       |              | Mooloolah River  |              |
|--------------|-----------------------|--------------------------------|----------------------------|------------------|--------------|------------------|--------------|
|              |                       |                                |                            | No. of Specimens | % of surveys | No. of Specimens | % of surveys |
| Nudibranchia | Samliidae             | <i>Samla</i> sp.1              | undescribed                | 1                | 2            | 1                | 1            |
| Nudibranchia | Scyllaeidae           | <i>Notobryon wardi</i>         | Odhner, 1936               | -                | -            | 1                | 1            |
| Nudibranchia | Trinchesiidae         | <i>Phestilla minor</i>         | Rudman, 1981               | -                | -            | 1                | 1            |
| Nudibranchia | Trinchesiidae         | <i>Trinchesia diversicolor</i> | Baba, 1975                 | 1                | 2            | 6                | 4            |
| Nudibranchia | Trinchesiidae         | <i>Trinchesia ornata</i>       | (Baba, 1937)               | -                | -            | 1                | 1            |
| Nudibranchia | Trinchesiidae         | <i>Trinchesia sibogae</i>      | (Bergh, 1905)              | 4                | 7            | 265              | 42           |
| Nudibranchia | Trinchesiidae         | <i>Trinchesia</i> sp. 3        | undescribed                | 8                | 17           | -                | -            |
| Nudibranchia | Trinchesiidae         | <i>Trinchesia</i> sp.13        | undescribed                | 1                | 2            | -                | -            |
| Nudibranchia | Trinchesiidae         | <i>Trinchesia</i> sp.17        | undescribed                | -                | -            | 4                | 2            |
| Nudibranchia | Trinchesiidae         | <i>Trinchesia</i> sp.20        | undescribed                | 1                | 2            | -                | -            |
| Nudibranchia | Trinchesiidae         | <i>Trinchesia</i> sp.21        | undescribed                | 2                | 5            | -                | -            |
| Nudibranchia | Trinchesiidae         | <i>Trinchesia</i> sp.23        | undescribed                | -                | -            | 115              | 30           |
| Nudibranchia | Trinchesiidae         | <i>Trinchesia</i> sp.24        | undescribed                | 2                | 2            | 53               | 18           |
| Nudibranchia | Trinchesiidae         | <i>Trinchesia</i> sp.25        | undescribed                | -                | -            | 2                | 1            |
| Nudibranchia | Trinchesiidae         | <i>Trinchesia</i> sp.26        | undescribed                | 1                | 2            | -                | -            |
| Nudibranchia | Trinchesiidae         | <i>Trinchesia</i> sp.28        | undescribed                | -                | -            | 1                | 1            |
| Nudibranchia | Trinchesiidae         | <i>Trinchesia</i> sp.29        | undescribed                | 1                | 2            | 16               | 7            |
| Nudibranchia | Trinchesiidae         | <i>Trinchesia</i> sp.30        | undescribed                | -                | -            | 3                | 2            |
| Nudibranchia | Trinchesiidae         | <i>Trinchesia</i> sp.31        | undescribed                | -                | -            | 1                | 1            |
| Nudibranchia | Trinchesiidae         | <i>Trinchesia</i> sp.32        | undescribed                | -                | -            | 47               | 10           |
| Nudibranchia | Trinchesiidae         | <i>Trinchesia</i> sp.33        | undescribed                | 3                | 5            | 1                | 1            |
| Nudibranchia | Trinchesiidae         | <i>Trinchesia</i> sp.35        | undescribed                | -                | -            | 1                | 1            |
| Nudibranchia | Trinchesiidae         | <i>Trinchesia</i> sp.36        | undescribed                | -                | -            | 1                | 1            |
| Nudibranchia | Trinchesiidae         | <i>Trinchesia</i> sp.37        | undescribed                | -                | -            | 1                | 1            |
| Nudibranchia | Trinchesiidae         | <i>Trinchesia</i> sp.40        | undescribed                | 1                | 2            | -                | -            |
| Nudibranchia | Trinchesiidae         | <i>Trinchesia</i> sp.44        | undescribed                | -                | -            | 72               | 18           |
| Nudibranchia | Trinchesiidae         | <i>Trinchesia</i> sp.46        | undescribed                | 1                | 2            | -                | -            |
| Nudibranchia | Trinchesiidae         | <i>Trinchesia</i> sp.50        | undescribed                | -                | -            | 3                | 2            |
| Nudibranchia | Trinchesiidae         | <i>Trinchesia</i> sp.51        | undescribed                | -                | -            | 21               | 5            |
| Nudibranchia | Trinchesiidae         | <i>Trinchesia</i> sp.53        | undescribed                | -                | -            | 2                | 1            |
| Nudibranchia | Tritoniidae           | <i>Marionia pustulosa</i>      | Odhner, 1936               | -                | -            | 6                | 3            |
| Nudibranchia | Tritoniidae           | <i>Marionia rubra</i>          | (Rüppell & Leuckart, 1828) | 2                | 2            | -                | -            |
| Nudibranchia | Tritoniidae           | <i>Marionia</i> sp.2           | undescribed                | 7                | 12           | -                | -            |
| Nudibranchia | Tritoniidae           | <i>Tritonia</i> sp.3           | undescribed                | 1                | 2            | -                | -            |

Table S1- Summarised list of species, number of specimens and frequency of sighting.

| Order           | Family (as per WoRMS) | Species Name                  | Author                                      | Nudi Ledge       |              | Mooloolah River  |              |
|-----------------|-----------------------|-------------------------------|---------------------------------------------|------------------|--------------|------------------|--------------|
|                 |                       |                               |                                             | No. of Specimens | % of surveys | No. of Specimens | % of surveys |
| Nudibranchia    | Tritoniidae           | <i>Tritonia</i> sp.4          | undescribed                                 | 3                | 5            | -                | -            |
| Nudibranchia    | Tritoniidae           | <i>Tritoniopsis elegans</i>   | (Audouin, 1826)                             | 67               | 61           | -                | -            |
| Nudibranchia    | Unidentiidae          | <i>Unidentia</i> sp.1         | undescribed                                 | -                | -            | 2964             | 70           |
| Pleurobranchida | Pleurobranchaeidae    | <i>Euselenops luniceps</i>    | (Cuvier, 1816)                              | -                | -            | 3                | 1            |
| Pleurobranchida | Pleurobranchidae      | <i>Berthella martensi</i>     | (Pilsbry, 1896)                             | 19               | 27           | -                | -            |
| Pleurobranchida | Pleurobranchidae      | <i>Berthellina citrina</i>    | (Rüppell & Leuckart, 1828)                  | -                | -            | 1                | 1            |
| Pleurobranchida | Pleurobranchidae      | <i>Pleurobranchus grandis</i> | Pease, 1868                                 | -                | -            | 4                | 2            |
| Pleurobranchida | Pleurobranchidae      | <i>Pleurobranchus peronii</i> | Cuvier, 1804                                | 5                | 10           | 101              | 17           |
| Pleurobranchida | Pleurobranchidae      | <i>Pleurobranchus weberi</i>  | (Bergh, 1905)                               | -                | -            | 93               | 23           |
| Runcinida       | Ilbiidae              | <i>Ilbia ilbi</i>             | Burn, 1963                                  | 1                | 2            | 1                | 1            |
| Runcinida       | Runcinidae            | <i>Runcina</i> sp.5           | undescribed                                 | 1                | 2            | -                | -            |
| Sacoglossa*     | Costasiellidae        | <i>Costasiella kuroshimae</i> | Ichikawa, 1993                              | 3                | 2            | 1                | 1            |
| Sacoglossa*     | Costasiellidae        | <i>Costasiella</i> sp.2       | undescribed                                 | -                | -            | 3                | 1            |
| Sacoglossa*     | Hermaeidae            | <i>Cyerce nigra</i>           | Bergh, 1871                                 | -                | -            | 1                | 1            |
| Sacoglossa*     | Hermaeidae            | <i>Hermaea</i> sp.6           | undescribed                                 | 1                | 2            | -                | -            |
| Sacoglossa*     | Hermaeidae            | <i>Hermaea</i> sp.7           | undescribed                                 | 1                | 2            | 1                | 1            |
| Sacoglossa*     | Juliidae              | <i>Julia exquisita</i>        | Gould, 1862                                 | -                | -            | 2                | 1            |
| Sacoglossa*     | Juliidae              | <i>Tamanovalva</i> sp.1       | undescribed                                 | -                | -            | 1                | 1            |
| Sacoglossa*     | Oxynoidae             | <i>Lobiger</i> sp.1           | undescribed                                 | 2                | 5            | -                | -            |
| Sacoglossa*     | Oxynoidae             | <i>Oxynoe viridis</i>         | (Pease, 1861)                               | 11               | 12           | -                | -            |
| Sacoglossa*     | Plakobanchidae        | <i>Elysia asbecki</i>         | Wägele, Stemmer, Burghardt & Händeler, 2010 | -                | -            | 1                | 1            |
| Sacoglossa*     | Plakobanchidae        | <i>Elysia coodgeensis</i>     | Angas, 1864                                 | -                | -            | 1                | 1            |
| Sacoglossa*     | Plakobanchidae        | <i>Elysia maoria</i>          | Powell, 1937                                | 17               | 22           | -                | -            |
| Sacoglossa*     | Plakobanchidae        | <i>Elysia pusilla</i>         | (Bergh, 1871)                               | 12               | 17           | 23               | 17           |
| Sacoglossa*     | Plakobanchidae        | <i>Elysia</i> sp.11           | undescribed                                 | 1                | 2            | 16               | 10           |
| Sacoglossa*     | Plakobanchidae        | <i>Elysia</i> sp.12           | undescribed                                 | -                | -            | 1                | 1            |
| Sacoglossa*     | Plakobanchidae        | <i>Elysia</i> sp.15           | undescribed                                 | 1                | 2            | -                | -            |
| Sacoglossa*     | Plakobanchidae        | <i>Elysia</i> sp.16           | undescribed                                 | -                | -            | 1                | 1            |
| Sacoglossa*     | Plakobanchidae        | <i>Elysia</i> sp.17           | undescribed                                 | -                | -            | 7                | 3            |
| Sacoglossa*     | Plakobanchidae        | <i>Elysia</i> sp.18           | undescribed                                 | -                | -            | 1                | 1            |
| Sacoglossa*     | Plakobanchidae        | <i>Elysia</i> sp.19           | undescribed                                 | -                | -            | 3                | 2            |
| Sacoglossa*     | Plakobanchidae        | <i>Elysia</i> sp.23           | undescribed                                 | -                | -            | 1                | 1            |
| Sacoglossa*     | Plakobanchidae        | <i>Elysia</i> sp.5            | undescribed                                 | 2                | 2            | -                | -            |
| Sacoglossa*     | Plakobanchidae        | <i>Plakobanchus ocellatus</i> | van Hasselt, 1824                           | -                | -            | 18               | 5            |

Table S1- Summarised list of species, number of specimens and frequency of sighting.

| Order       | Family (as per WoRMS) | Species Name               | Author         | Nudi Ledge       |              | Mooloolah River  |              |
|-------------|-----------------------|----------------------------|----------------|------------------|--------------|------------------|--------------|
|             |                       |                            |                | No. of Specimens | % of surveys | No. of Specimens | % of surveys |
| Sacoglossa* | Plakobanchidae        | <i>Thuridilla carlsoni</i> | Gosliner, 1995 | 13               | 24           | 37               | 10           |
| Umbraculida | Tylodinidae           | <i>Tylodina corticalis</i> | (Tate, 1889)   | 45               | 39           | -                | -            |

Acteonoidea# Superfamily (no order)

Sacoglossa\* Superorder (no order)
